# Supplementary material for: Injury risk is low among world-class volleyball players: 4-year data from the FIVB Injury Surveillance System
Source: PubMed Central journal article supplement — Br J Sports Med. 2015 Jul 20;49(17):1132–7. doi: 10.1136/bjsports-2015-094959 (PMC4552924; doi:10.1136/bjsports-2015-094959), 2015-07-20
Supplement: bjsports-2015-094959-s1.pdf [file bjsports-2015-094959-s1.pdf]

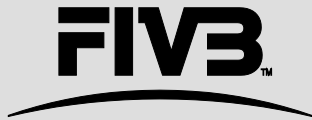

# Injury Report Form

**M-10**

Event:  Place:  Dates:   
 Team:  Match:  -  Match #:  Date:   
 Team Doctor:  Mobile:  E-mail:

*NOTE: An injury is defined as any physical complaint sustained by a player during the match or during training prior to the match.*

Any injury?  NO  YES If "YES", please complete information below

| Player # | Function<br>Code | Time of injury     |                  | Injury location |      | Type of injury |      | Cause of injury |      | Severity                                                 |                   |
|----------|------------------|--------------------|------------------|-----------------|------|----------------|------|-----------------|------|----------------------------------------------------------|-------------------|
|          |                  | Training<br>(date) | Match<br>(set #) | Description     | Code | Description    | Code | Description     | Code | Returned to game                                         | Absence<br>(Code) |
|          |                  |                    |                  |                 |      |                |      |                 |      | <input type="checkbox"/> Yes <input type="checkbox"/> No |                   |
|          |                  |                    |                  |                 |      |                |      |                 |      | <input type="checkbox"/> Yes <input type="checkbox"/> No |                   |
|          |                  |                    |                  |                 |      |                |      |                 |      | <input type="checkbox"/> Yes <input type="checkbox"/> No |                   |
|          |                  |                    |                  |                 |      |                |      |                 |      | <input type="checkbox"/> Yes <input type="checkbox"/> No |                   |
|          |                  |                    |                  |                 |      |                |      |                 |      | <input type="checkbox"/> Yes <input type="checkbox"/> No |                   |
|          |                  |                    |                  |                 |      |                |      |                 |      | <input type="checkbox"/> Yes <input type="checkbox"/> No |                   |

**Definitions & Codes**

**Player function:**

- S: Setter
- D: Diagonal
- O: Outside hitter
- C: Center player
- L: Libero

**Injury location - injured body part:**

- Head and trunk*
- 1. face (incl. eye, ear, nose)
  - 2. head
  - 3. neck/cervical spine
  - 4. thoracic spine/upper back
  - 5. sternum/ribs
  - 6. lumbar spine/lower back
  - 7. abdomen
  - 8. pelvis/sacrum/buttock

*Upper extremity*

- 11. shoulder/clavicle
- 12. upper arm
- 13. elbow
- 14. forearm
- 15. wrist
- 16. hand
- 17. finger
- 18. thumb

*Lower extremity*

- 21. hip
- 22. groin
- 23. thigh (a: anterior/p: posterior)
- 24. knee (m: medial/l: lateral)
- 25. lower leg (a: anterior/p: posterior)
- 26. Achilles tendon
- 27. ankle (m: medial/l: lateral)
- 28. foot/toe

**Type of injury - diagnosis:**

- 1. concussion (regardless of loss of consciousness)
- 2. fracture (traumatic)
- 3. stress fracture (overuse)
- 4. other bone injuries
- 5. dislocation, subluxation
- 6. tendon rupture
- 7. ligamentous rupture
- 8. sprain (injury of joint and/or ligaments)
- 9. lesion of meniscus or cartilage
- 10. strain/muscle rupture/ tear
- 11. contusion/ haematoma/bruise
- 12. tendinosis/tendinopathy
- 13. arthritis/synovitis/bursitis
- 14. fasciitis/aponeurosis injury
- 15. impingement
- 16. laceration/abrasion/skin lesion
- 17. dental injury/broken tooth

- 18. nerve injury/spinal cord injury
- 19. muscle cramps or spasm
- 20. other

**Cause of injury - diagnosis:**

- 1. overuse (gradual onset)
- 2. overuse (sudden onset)
- 3. non-contact trauma
- 4. recurrence of previous injury
- 11. contact with another athlete
- 12. contact: moving object (eg. ball)
- 13. contact: stagnant object (eg. net, post)
- 14. violation of rules (foul play)
- 21. field of play conditions
- 22. hall environmental conditions
- 23. equipment failure
- 24. other

**Severity - expected duration of absence from training or competition (in days):**

- 0: 0 days
- 1: 1 day
- 2: 2 days
- 7: 1 week
- 14: 2 weeks
- 21: 3 weeks
- 28: 4 weeks
- >30: more than 4 weeks
- >180: 6 months or more

Signature Team Doctor:
